# Supplementary material for: Serum Proteome Changes in Healthy Subjects with Different Genotypes ofNOS1APin the Chinese Population
Source: Hindawi journal article supplement (doi:10.1155/2013/357630), 2013-01-01
Supplement: f1 [file 357630.f1.pdf]

| Protein       | Description                                                                                | 1         | 2         | 3         | 4         | 5       | 6       | 8       | 9       | 12      |
|---------------|--------------------------------------------------------------------------------------------|-----------|-----------|-----------|-----------|---------|---------|---------|---------|---------|
| 13            | 14                                                                                         | 15        | 1_count   | 2_count   | 3_count   | 4_count | 5_count | 6_count | 8_count | 9_count |
| 14_count      | 15_count                                                                                   | 8_count   | 9_count   | 12_count  | 13_count  |         |         |         |         |         |
| IPI00022229.1 | Tax_Id=9606 Gene_Symbol=APOB Apolipoprotein B-100                                          | -         |           |           |           |         |         |         |         |         |
| 6.870116      | -6.615649                                                                                  | -6.762898 | -6.715934 | -6.903232 | -6.656584 | -       |         |         |         |         |
| 6.266894      | -6.561369                                                                                  | -6.878192 | -6.53119  | -6.301183 | -6.70611  | 217     |         |         |         |         |
| 224           | 229                                                                                        | 227       | 257       | 154       | 253       | 212     | 221     | 126     | 186     | 148     |
| IPI00783987.2 | Tax_Id=9606 Gene_Symbol=C3 Complement C3 (Fragment)                                        | -         |           |           |           |         |         |         |         |         |
| 5.776825      | -5.354977                                                                                  | -5.736225 | -5.671941 | -5.492309 | -5.318203 | -       |         |         |         |         |
| 4.918808      | -5.367334                                                                                  | -5.807412 | -5.554094 | -5.554728 | -5.663527 | 236     |         |         |         |         |
| 288           | 233                                                                                        | 235       | 384       | 214       | 355       | 255     | 235     | 122     | 143     | 153     |
| IPI00643525.1 | Tax_Id=9606 Gene_Symbol=C4A Putative uncharacterized protein C4A                           | -         |           |           |           |         |         |         |         |         |
| -6.467933     | -6.522201                                                                                  | -6.422637 | -6.383294 | -6.378522 | -         |         |         |         |         |         |
| 6.031257      | -5.602042                                                                                  | -6.283327 | -6.750207 | -6.454429 | -6.170681 | -       |         |         |         |         |
| 6.384815      | 124                                                                                        | 94        | 123       | 121       | 166       | 110     | 188     | 107     | 96      | 52      |
| 78            |                                                                                            |           |           |           |           |         |         |         |         |         |
| IPI00892604.1 | Tax_Id=9606 Gene_Symbol=C4A;LOC100292046;C4B Complement component C4B (Childo blood group) | 2         |           |           |           |         |         |         |         |         |
| -6.391593     | -6.354711                                                                                  | -6.013238 | -5.596737 | -6.283327 | -6.77126  | -       |         |         |         |         |
| -6.454429     | -6.170681                                                                                  | -6.397718 | 125       | 97        | 123       | 120     | 170     | 112     |         |         |
| 189           | 107                                                                                        | 94        | 52        | 81        | 77        |         |         |         |         |         |
| IPI00654875.1 | Tax_Id=9606 Gene_Symbol=C4B Complement C4-B                                                | -6.47603  |           |           |           |         |         |         |         |         |
| -6.480529     | -6.455698                                                                                  | -6.4084   | -6.372516 | -6.058908 | -5.639987 | -       |         |         |         |         |
| -6.350986     | -6.77126                                                                                   | -6.454429 | -6.208422 | -6.437458 | 123       | 98      |         |         |         |         |
| 119           | 118                                                                                        | 167       | 107       | 181       | 100       | 94      | 52      | 78      | 74      |         |
| IPI00032258.4 | Tax_Id=9606 Gene_Symbol=C4A Complement C4-A                                                | -6.492424 |           |           |           |         |         |         |         |         |
| -6.511619     | -6.455698                                                                                  | -6.399961 | -6.396759 | -6.077777 | -5.645527 | -       |         |         |         |         |
| -6.350986     | -6.750207                                                                                  | -6.454429 | -6.208422 | -6.424035 | 121       | 95      |         |         |         |         |
| 119           | 119                                                                                        | 163       | 105       | 180       | 100       | 96      | 52      | 78      | 75      |         |
| IPI00478003.2 | Tax_Id=9606 Gene_Symbol=A2M Alpha-2-macroglobulin                                          | -         |           |           |           |         |         |         |         |         |
| 5.782475      | -5.104281                                                                                  | -5.924956 | -5.599237 | -5.258523 | -5.421872 | -       |         |         |         |         |
| 5.366978      | -5.525264                                                                                  | -6.010555 | -5.806655 | -5.669541 | -5.78583  | 208     |         |         |         |         |
| 328           | 171                                                                                        | 224       | 430       | 171       | 201       | 193     | 170     | 84      | 113     | 120     |
| IPI00845263.1 | Tax_Id=9606 Gene_Symbol=FN1 fibronectin isoform 2 preproprotein                            | -         |           |           |           |         |         |         |         |         |
| -7.457331     | -7.404511                                                                                  | -7.388433 | -7.464033 | -7.487775 | -         |         |         |         |         |         |
| -7.370857     | -6.822678                                                                                  | -7.313863 | -7.408448 | -7.150154 | -6.673622 | -       |         |         |         |         |
| -7.026472     | 64                                                                                         | 54        | 65        | 57        | 76        | 40      | 77      | 53      | 69      | 36      |
| 68            | 57                                                                                         |           |           |           |           |         |         |         |         |         |
| IPI00414283.6 | Tax_Id=9606 Gene_Symbol=FN1 Isoform 9 of Fibronectin                                       | -         |           |           |           |         |         |         |         |         |
| -7.411375     | -7.345499                                                                                  | -7.310729 | -7.368936 | -7.423316 | -7.293152 | -       |         |         |         |         |
| -6.744973     | -7.236159                                                                                  | -7.330743 | -7.072449 | -6.595917 | -6.948767 | -       |         |         |         |         |
| 62            | 53                                                                                         | 65        | 58        | 75        | 40        | 77      | 53      | 69      | 36      | 68      |
| 57            |                                                                                            |           |           |           |           |         |         |         |         |         |
| IPI00479723.4 | Tax_Id=9606 Gene_Symbol=FN1 FN1 protein                                                    | -7.379626 |           |           |           |         |         |         |         |         |
| 7.345499      | -7.341981                                                                                  | -7.368936 | -7.410071 | -7.31847  | -6.744973 | -       |         |         |         |         |
| 7.255207      | -7.390462                                                                                  | -7.072449 | -6.595917 | -6.948767 | 64        | 53      | 63      |         |         |         |
| 58            | 76                                                                                         | 39        | 77        | 52        | 65        | 36      | 68      | 57      |         |         |
| IPI00745872.2 | Tax_Id=9606 Gene_Symbol=ALB Isoform 1 of Serum albumin                                     | -         |           |           |           |         |         |         |         |         |
| -3.069058     | -2.814446                                                                                  | -2.557108 | -2.640914 | -3.318755 | -1.861993 | -       |         |         |         |         |
| -3.056542     | -3.11845                                                                                   | -3.181569 | -2.841809 | -2.97054  | -3.370437 | -       |         |         |         |         |
| 1296          | 1338                                                                                       | 2050      | 1783      | 1236      | 2484      | 837     | 885     | 1189    | 673     | 694     |
| 555           |                                                                                            |           |           |           |           |         |         |         |         |         |
| IPI00029739.5 | Tax_Id=9606 Gene_Symbol=CFH Isoform 1 of Complement factor H                               | -         |           |           |           |         |         |         |         |         |
| -6.44005      | -6.440475                                                                                  | -6.50444  | -6.319871 | -6.497764 | -         |         |         |         |         |         |
| 6.622183      | -5.99032                                                                                   | -6.547359 | -7.252629 | -6.838443 | -6.057893 | -       |         |         |         |         |

|                           |     |              |                   |                               |           |           |           |           |     |           |    |
|---------------------------|-----|--------------|-------------------|-------------------------------|-----------|-----------|-----------|-----------|-----|-----------|----|
| 6.564528                  | 90  | 72           | 80                | 91                            | 104       | 43        | 90        | 58        | 41  | 25        | 64 |
| 46                        |     |              |                   |                               |           |           |           |           |     |           |    |
| IPI00022463.1             |     | Tax_Id=9606  | Gene_Symbol=TF    | Serotransferrin               |           |           |           |           |     | -4.777786 |    |
| -5.145832                 |     | -4.789675    | -4.86069          | -4.419934                     | -4.192002 |           |           |           |     | -4.346818 |    |
| -5.010001                 |     | -5.305088    | -4.753757         | -4.555663                     | -4.49793  | 269       | 149       |           |     |           |    |
| 252                       | 222 | 471          | 277               | 264                           | 153       | 163       | 114       | 163       | 206 |           |    |
| IPI00019580.1             |     | Tax_Id=9606  | Gene_Symbol=PLG   | Plasminogen                   |           |           |           |           |     | -6.832433 | -  |
| 7.163099                  |     | -6.912571    | -6.69861          | -7.010035                     | -6.969103 | -6.221434 |           |           |     | -         |    |
| 6.181921                  |     | -7.081917    | -7.441546         | -6.579352                     | -6.755745 | 40        | 23        | 35        |     |           |    |
| 41                        | 41  | 20           | 47                | 55                            | 32        | 9         | 25        | 25        |     |           |    |
| IPI00019591.2             |     | "Tax_Id=9606 | Gene_Symbol=-     | cDNA FLJ55673, highly similar |           |           |           |           |     |           |    |
| to Complement factor B"   |     |              | -7.254324         | -7.161658                     | -7.417995 | -7.562929 |           |           |     |           |    |
| -7.386001                 |     | -7.320376    | -6.586339         | -7.268541                     | -7.77536  | -7.140915 |           |           |     |           |    |
| -6.986715                 |     | -7.28571     | 41                | 36                            | 33        | 27        | 44        | 22        | 51  | 29        |    |
| 25                        | 19  | 26           | 23                |                               |           |           |           |           |     |           |    |
| IPI00944960.1             |     | Tax_Id=9606  | Gene_Symbol=ITIH4 | ITIH4 protein                 |           |           |           |           |     | -6.927155 |    |
| -6.778544                 |     | -6.94787     | -6.892133         | -7.038478                     | -6.776143 | -6.244802 |           |           |     |           |    |
| -6.619194                 |     | -7.080247    | -6.044613         | -6.763687                     | -6.684146 | 42        | 39        |           |     |           |    |
| 39                        | 39  | 46           | 28                | 53                            | 41        | 37        | 42        | 24        | 31  |           |    |
| IPI00032291.2             |     | Tax_Id=9606  | Gene_Symbol=C5    | Complement C5                 |           |           |           |           |     | -8.304004 |    |
| -8.192511                 |     | -7.899213    | -7.738116         | -7.985002                     | -8.746056 | -7.663219 |           |           |     |           |    |
| -7.450649                 |     | -8.279052    | -8.28646          | -7.58092                      | -7.523698 | 19        | 17        |           |     |           |    |
| 27                        | 30  | 32           | 7                 | 23                            | 32        | 20        | 8         | 19        | 24  |           |    |
| IPI00220327.4             |     | "Tax_Id=9606 | Gene_Symbol=KRT1  | Keratin, type II              |           |           |           |           |     |           |    |
| cytoskeletal 1"           |     |              | -6.826241         | -7.296669                     | -6.980487 | -6.656486 | -6.997764 |           |     |           |    |
| -5.803674                 |     | -6.797724    | -6.868876         | -7.427946                     | -5.825916 | -5.784703 |           |           |     |           |    |
| -6.007616                 |     | 32           | 16                | 26                            | 34        | 33        | 51        | 21        | 22  | 18        | 36 |
| 44                        | 42  |              |                   |                               |           |           |           |           |     |           |    |
| IPI00025426.3             |     | Tax_Id=9606  | Gene_Symbol=PZP   | Isoform 1 of Pregnancy zone   |           |           |           |           |     |           |    |
| protein                   |     |              | -8.352837         | -8.012335                     | -8.874808 | -7.758199 | -7.960425 | -         |     |           |    |
| 8.266363                  |     | -7.785324    | -8.395472         | -8.060724                     | -8.85659  | -7.629753 | -         |           |     |           |    |
| 7.806146                  | 16  | 18           | 9                 | 26                            | 29        | 10        | 18        | 11        | 22  | 4         | 16 |
| 16                        |     |              |                   |                               |           |           |           |           |     |           |    |
| IPI00019568.1             |     | Tax_Id=9606  | Gene_Symbol=F2    | Prothrombin (Fragment)        |           |           |           |           |     | -         |    |
| 6.791482                  |     | -6.508139    | -6.620306         | -6.484527                     | -6.381975 | -6.442644 | -         |           |     |           |    |
| 5.800154                  |     | -6.929427    | -6.522359         | -6.155801                     | -6.007773 | -6.820155 | 32        |           |     |           |    |
| 34                        | 36  | 39           | 59                | 26                            | 55        | 20        | 43        | 25        | 34  | 18        |    |
| IPI00021304.1             |     | "Tax_Id=9606 | Gene_Symbol=KRT2  | Keratin, type II              |           |           |           |           |     |           |    |
| cytoskeletal 2 epidermal" |     |              | -8.347618         | -7.873585                     | -8.294225 | -7.699492 |           |           |     |           |    |
| -7.856766                 |     | -6.21069     | -7.358891         | -8.16971                      | -8.710431 | -7.108402 |           |           |     |           |    |
| -6.626005                 |     | -6.802398    | 7                 | 9                             | 7         | 12        | 14        | 34        | 12  | 6         |    |
| 5                         | 10  | 19           | 19                |                               |           |           |           |           |     |           |    |
| IPI00021727.1             |     | Tax_Id=9606  | Gene_Symbol=C4BPA | C4b-binding protein alpha     |           |           |           |           |     |           |    |
| chain                     |     |              | -6.089061         | -6.164835                     | -6.356139 | -5.932678 | -6.074685 | -5.853055 |     |           |    |
| -5.57681                  |     | -6.146467    | -6.687188         | -5.966358                     | -5.62191  | -5.931834 |           |           |     |           |    |
| 62                        | 46  | 45           | 65                | 77                            | 45        | 66        | 42        | 35        | 29  | 48        | 42 |
| IPI00947496.1             |     | Tax_Id=9606  | Gene_Symbol=-     | 124 kDa protein               |           |           |           |           |     | -7.314527 |    |
| -7.091809                 |     | -7.491658    | -7.596264         | -7.487834                     | -7.57636  | -6.702278 |           |           |     |           |    |
| -7.250733                 |     | -7.976857    | -7.125133         | -6.93975                      | -7.349758 | 34        | 34        |           |     |           |    |
| 27                        | 23  | 35           | 15                | 40                            | 26        | 18        | 17        | 24        | 19  |           |    |
| IPI00017601.1             |     | Tax_Id=9606  | Gene_Symbol=CP    | Ceruloplasmin                 |           |           |           |           |     | -7.536912 |    |
| -7.353414                 |     | -7.606121    | -7.795506         | -7.386385                     | -7.530481 | -7.349545 |           |           |     |           |    |
| -7.518511                 |     | -7.87691     | -7.609882         | -7.432867                     | -7.683368 | 26        | 25        |           |     |           |    |
| 23                        | 18  | 37           | 15                | 20                            | 19        | 19        | 10        | 14        | 13  |           |    |



IPI00009865.4 "Tax\_Id=9606 Gene\_Symbol=KRT10 Keratin, type I  
cytoskeletal 10" -7.709272 -8.362023 -8.194876 -7.887824 -8.199249  
-6.171966 -6.006779 -8.070361 -7.447931 -7.009052 -6.212998  
-7.082538 12 5 7 9 9 32 42 6 16 10  
26 13

IPI00879709.3 Tax\_Id=9606 Gene\_Symbol=C6 Complement component 6  
precursor -7.840131 -8.371184 -8.674041 -8.166319 -8.477744 -  
8.170957 -7.279175 -8.731848 -8.134736 -8.404508 -7.870819 -  
7.824068 17 8 7 11 11 7 19 5 13 4 8  
10

IPI00645363.2 Tax\_Id=9606 Gene\_Symbol=LOC100294459;IGHV4-  
31;IGHG1;LOC100290146 Putative uncharacterized protein DKFZp686P15220  
-3.84353 -3.34672 -3.532602 -3.392083 -3.335547 -3.864098  
-3.639882 -3.698556 -3.392872 -3.025671 -3.444042 -3.399084  
463 609 599 652 942 260 362 384 746 434 335 418

IPI00386879.1 "Tax\_Id=9606 Gene\_Symbol=IGHA1 cDNA FLJ14473 fis, clone  
MAMMA1001080, highly similar to Homo sapiens SNC73 protein (SNC73) mRNA"  
-4.277421 -5.434647 -5.309981 -5.774549 -4.795386 -5.538511  
-5.099746 -5.079634 -6.315485 -5.560753 -5.333438 -5.491138  
314 79 106 63 229 51 88 101 42 36 53 54

IPI00305461.4 "Tax\_Id=9606 Gene\_Symbol=ITIH2 Inter-alpha (Globulin)  
inhibitor H2, isoform CRA\_a" -7.151217 -6.989123 -7.328347 -7.523925  
-7.242286 -7.287886 -6.315824 -6.734601 -7.371713 -6.57616  
-6.818999 -7.086363 34 32 27 21 38 17 50 37  
28 25 23 21

IPI00022488.1 Tax\_Id=9606 Gene\_Symbol=HPX Hemopexin -6.04782 -  
5.694073 -5.881098 -6.295365 -5.831404 -5.642165 -5.399239 -  
5.602433 -6.375266 -5.676104 -5.710398 -5.886791 50 57 56  
35 76 43 61 56 37 30 34 34

IPI00022895.7 Tax\_Id=9606 Gene\_Symbol=AlBG Alpha-1B-glycoprotein -  
6.850782 -6.30961 -6.797389 -6.661609 -6.70477 -6.336864 -  
6.360229 -6.518723 -7.221963 -6.055252 -6.472538 -6.709556 24  
33 24 26 34 23 25 24 17 22 17 16

IPI00026314.1 Tax\_Id=9606 Gene\_Symbol=GSN Isoform 1 of Gelsolin -  
7.847075 -7.044538 -7.488301 -7.979108 -7.469552 -7.444749 -  
6.900908 -7.158342 -7.568034 -7.406367 -6.929835 -7.454535 14  
25 19 11 25 12 23 20 19 9 17 12

IPI00291867.3 Tax\_Id=9606 Gene\_Symbol=CFI Complement factor I -  
7.79457 -7.571851 -7.500015 -7.038813 -7.450321 -7.556546 -  
6.484638 -7.221349 -7.174283 -6.825017 -6.696792 -8.036336 11  
11 14 21 19 8 26 14 21 12 16 5

IPI00296608.6 Tax\_Id=9606 Gene\_Symbol=C7 Complement component C7 -  
8.615335 -7.773577 -8.109956 -8.14953 -7.505443 -8.058857 -  
8.165604 -7.395973 -8.795826 -7.886944 -7.758719 -8.222794 7  
13 11 10 26 7 7 17 6 6 8 6

IPI00022395.1 Tax\_Id=9606 Gene\_Symbol=C9 Complement component C9 -  
7.665521 -8.541415 -8.017593 -7.643402 -7.26168 -7.514509 -  
7.21579 -7.420474 -8.230858 -11.100467 -7.635584 -7.994298 12  
4 8 11 22 8 12 11 7 0 6 5

IPI00553177.1 Tax\_Id=9606 Gene\_Symbol=SERPINA1 Isoform 1 of Alpha-1-  
antitrypsin -4.689275 -4.18172 -4.916017 -5.228841 -4.239008 -  
4.51579 -4.233879 -4.312765 -4.762136 -4.728723 -4.962288 -  
4.364308 176 234 133 92 338 120 177 184 168 70 65

IPI00647704.1 "Tax\_Id=9606 Gene\_Symbol=IGHA1 cDNA FLJ41552 fis, clone COLON2004478, highly similar to Protein Tro alpha H,myeloma" -4.264762  
-5.409646 -5.282072 -5.743296 -4.795386 -5.558313 -5.088447  
-5.021926 -6.364275 -5.560753 -5.333438 -5.419679 318 81  
109 65 229 50 89 107 40 36 53 58

IPI00449920.1 "Tax\_Id=9606 Gene\_Symbol=IGHA1 cDNA FLJ90170 fis, clone MAMMA1000370, highly similar to Ig alpha-1 chain C region" -4.275394  
-5.432621 -5.327003 -5.788523 -4.780345 -5.556287 -5.08642  
-5.077608 -6.362248 -5.558727 -5.276351 -5.452744 314 79  
104 62 232 50 89 101 40 36 56 56

IPI00423462.5 Tax\_Id=9606 Gene\_Symbol=IGHA1 Putative uncharacterized protein DKFZp686K18196 (Fragment) -4.326789 -5.484015 -5.368828 -  
5.839918 -4.844755 -5.607682 -5.160543 -5.129003 -6.413643 -  
5.610121 -5.382806 -5.540507 314 79 105 62 229 50 87  
101 40 36 53 54

IPI00385264.1 Tax\_Id=9606 Gene\_Symbol=- Ig mu heavy chain disease protein -6.237637 -6.27443 -6.050713 -5.556721 -5.075299 -  
5.598922 -6.124379 -5.453594 -6.058126 -6.020072 -5.332232 -  
5.662775 35 27 40 62 137 38 25 55 43 18 42  
36

IPI00784830.1 "Tax\_Id=9606 Gene\_Symbol=LOC100126583;IGHA2 cDNA FLJ41981 fis, clone SMINT2011888, highly similar to Protein Tro alpha H,myeloma" -5.137345 -6.355836 -6.174959 -6.18984 -5.66096 -  
5.929704 -5.712664 -6.154123 -7.266294 -6.134268 -6.153964 -  
6.693262 131 31 44 41 95 34 47 34 16 20 23  
16

IPI00940245.1 Tax\_Id=9606 Gene\_Symbol=LOC100126583;IGHA2 Immunoglobulin heavy chain variant (Fragment) -4.979766 -6.198257 -  
6.01738 -6.056954 -5.524659 -5.743138 -5.576591 -6.026397 -  
7.108715 -5.97669 -5.996385 -6.600222 131 31 44 40 93  
35 46 33 16 20 23 15

IPI00426051.3 Tax\_Id=9606 Gene\_Symbol=IGHG2 Putative uncharacterized protein DKFZp686C15213 -4.496102 -4.252506 -4.540131 -4.416953 -  
4.391906 -4.941777 -4.464576 -4.828083 -4.453169 -4.176346 -  
4.635908 -4.49749 237 242 215 230 322 87 156 122 254  
135 100 137

IPI00477597.2 Tax\_Id=9606 Gene\_Symbol=HPR Isoform 1 of Haptoglobin-related protein -5.051508 -5.842844 -5.007967 -5.101442 -4.861495  
-5.042466 -4.978255 -5.067756 -5.732529 -6.154882 -4.842523  
-5.178546 102 37 101 87 151 59 70 72 53 14  
61 52

IPI00785067.1 Tax\_Id=9606 Gene\_Symbol=LOC100126583;IGHA2 IGH@ protein -5.122867 -6.374148 -6.160481 -6.200055 -5.667759 -5.886239  
-5.719692 -6.169498 -7.251816 -6.11979 -6.139486 -6.743323  
131 30 44 40 93 35 46 33 16 20 23 15

IPI00032179.3 Tax\_Id=9606 Gene\_Symbol=SERPINC1 Antithrombin-III -  
6.91964 -6.186096 -6.509572 -6.358525 -6.405257 -6.272191 -  
5.563188 -5.606752 -6.771627 -5.990579 -6.245346 -6.421739 21  
35 30 33 43 23 52 56 25 22 20 20

IPI00296165.6 "Tax\_Id=9606 Gene\_Symbol=C1R cDNA FLJ54471, highly similar to Complement C1r subcomponent" -7.4577 -6.960545 -7.304224  
-6.997173 -6.993516 -7.76622 -6.733533 -6.811984 -6.994493  
-6.523866 -6.971005 -7.022235 19 25 21 27 37 8  
25 26 31 20 15 17



|                              |              |                                |                                                            |            |            |            |     |    |     |     |    |    |
|------------------------------|--------------|--------------------------------|------------------------------------------------------------|------------|------------|------------|-----|----|-----|-----|----|----|
| IPI00922744.1                | Tax_Id=9606  | Gene_Symbol=C4B                | Complement protein C4B                                     |            |            |            |     |    |     |     |    |    |
| frameshift mutant (Fragment) | -6.138227    | -6.905907                      | -6.595659                                                  | -6.694073  |            |            |     |    |     |     |    |    |
|                              | -6.1582      | -5.959044                      | -5.632927                                                  | -5.960319  | -6.886702  | -6.508448  |     |    |     |     |    |    |
|                              | -6.137277    | -6.661977                      | 35                                                         | 13         | 21         | 18         | 42  | 24 | 37  | 30  |    |    |
|                              | 17           | 10                             | 17                                                         | 12         |            |            |     |    |     |     |    |    |
| IPI00032328.2                | Tax_Id=9606  | Gene_Symbol=KNG1               | Isoform HMW of Kininogen-1                                 |            |            |            |     |    |     |     |    |    |
|                              | -7.296244    | -6.773421                      | -7.06053                                                   | -6.815551  | -7.6039    | -6.902286  |     |    |     |     |    |    |
|                              | -6.441049    | -7.069546                      | -7.833411                                                  | -6.770378  | -6.57316   | -7.106228  |     |    |     |     |    |    |
|                              | 20           | 27                             | 24                                                         | 29         | 18         | 17         | 30  | 18 | 12  | 14  | 20 | 14 |
| IPI00879573.1                | Tax_Id=9606  | Gene_Symbol=SERPIND1           | Heparin cofactor 2                                         |            |            |            |     |    |     |     |    |    |
|                              | 7.839659     | -7.868255                      | -9.290344                                                  | -7.981844  | -7.531129  | -7.534497  | -   |    |     |     |    |    |
|                              | 6.696782     | -7.219919                      | -8.271465                                                  | -8.05573   | -7.522041  | -7.092298  | 9   |    |     |     |    |    |
|                              | 7            | 2                              | 7                                                          | 15         | 7          | 18         | 12  | 6  | 3   | 6   | 11 |    |
| IPI00294395.1                | Tax_Id=9606  | Gene_Symbol=C8B                | Complement component C8 beta chain                         |            |            |            |     |    |     |     |    |    |
|                              | -8.414335    | -8.373938                      | -8.543263                                                  | -8.71067   | -8.616629  | -7.703707  |     |    |     |     |    |    |
|                              | -7.191414    | -9.180888                      | -8.84614                                                   | -11.156134 | -7.873572  | -7.867643  |     |    |     |     |    |    |
|                              | 6            | 5                              | 5                                                          | 4          | 6          | 7          | 13  | 2  | 4   | 0   | 5  | 6  |
| IPI00294004.1                | Tax_Id=9606  | Gene_Symbol=PROS1              | Vitamin K-dependent protein S                              |            |            |            |     |    |     |     |    |    |
|                              | -8.26103     | -9.01914                       | -8.207636                                                  | -9.132729  | -8.751006  | -          |     |    |     |     |    |    |
|                              | 7.992234     | -7.811299                      | -8.216653                                                  | -8.980517  | -9.45793   | -8.231093  | -   |    |     |     |    |    |
|                              | 8.407486     | 8                              | 3                                                          | 8          | 3          | 6          | 6   | 8  | 6   | 4   | 1  | 4  |
|                              | 4            |                                |                                                            |            |            |            |     |    |     |     |    |    |
| IPI00478809.3                | Tax_Id=9606  | Gene_Symbol=F5                 | Coagulation factor V                                       |            |            |            |     |    |     |     |    |    |
|                              | 10.145046    | -10.21001                      | -10.7848                                                   | -11.422211 | -10.124198 | -12.807445 | -   |    |     |     |    |    |
|                              | 9.289851     | -10.10067                      | -10.459069                                                 | -9.550187  | -10.808257 | -9.19289   | 4   |    |     |     |    |    |
|                              | 3            | 2                              | 1                                                          | 5          | 0          | 6          | 3   | 3  | 3   | 1   | 6  |    |
| IPI00021841.1                | Tax_Id=9606  | Gene_Symbol=APOA1              | Apolipoprotein A-I                                         |            |            |            |     |    |     |     |    |    |
|                              | 6.772469     | -6.097766                      | -6.222639                                                  | -6.81749   | -5.64353   | -5.636173  | -   |    |     |     |    |    |
|                              | 5.783742     | -5.495949                      | -6.729817                                                  | -6.449544  | -6.385857  | -6.092247  | 14  |    |     |     |    |    |
|                              | 22           | 23                             | 12                                                         | 53         | 25         | 24         | 36  | 15 | 8   | 10  | 16 |    |
| IPI00298828.3                | Tax_Id=9606  | Gene_Symbol=APOH               | Beta-2-glycoprotein 1                                      |            |            |            |     |    |     |     |    |    |
|                              | 7.269927     | -6.672515                      | -6.975372                                                  | -6.919635  | -7.097529  | -6.71345   | -   |    |     |     |    |    |
|                              | 6.820197     | -6.850857                      | -6.986113                                                  | -7.398987  | -6.865297  | -6.923907  | 11  |    |     |     |    |    |
|                              | 16           | 14                             | 14                                                         | 16         | 11         | 11         | 12  | 15 | 4   | 8   | 9  |    |
| IPI00654888.4                | Tax_Id=9606  | Gene_Symbol=KLKB1              | Plasma kallikrein                                          |            |            |            |     |    |     |     |    |    |
|                              | 8.490857     | -7.494948                      | -8.031998                                                  | -7.608537  | -8.693152  | -7.780229  | -   |    |     |     |    |    |
|                              | 7.347979     | -8.004648                      | -8.699519                                                  | -7.790637  | -7.362308  | -7.790015  | 6   |    |     |     |    |    |
|                              | 13           | 9                              | 13                                                         | 6          | 7          | 12         | 7   | 5  | 5   | 9   | 7  |    |
| IPI00293665.9                | "Tax_Id=9606 | Gene_Symbol=KRT6B              | Keratin, type II cytoskeletal 6B"                          |            |            |            |     |    |     |     |    |    |
|                              | -8.367573    | -11.769195                     | -11.93852                                                  | -8.663908  | -9.66848   |            |     |    |     |     |    |    |
|                              | -7.523413    | -7.917842                      | -9.134127                                                  | -10.185673 | -7.890496  | -7.490338  |     |    |     |     |    |    |
|                              | -8.003203    | 6                              | 0                                                          | 0          | 4          | 2          | 8   | 6  | 2   | 1   | 4  |    |
|                              | 7            | 5                              |                                                            |            |            |            |     |    |     |     |    |    |
| IPI00889156.1                | Tax_Id=9606  | Gene_Symbol=IGKV3-20           | IGK@ protein                                               |            |            |            |     |    |     |     |    |    |
|                              | -3.466969    | -3.23578                       | -3.505657                                                  | -3.590507  | -3.379774  | -3.994192  |     |    |     |     |    |    |
|                              | -3.307077    | -3.209657                      | -4.115109                                                  | -3.777534  | -3.576633  | 493        | 270 |    |     |     |    |    |
|                              | 403          | 291                            | 365                                                        | 211        | 127        | 284        | 448 | 73 | 120 | 175 |    |    |
| IPI00894384.1                | Tax_Id=9606  | Gene_Symbol=LOC100126583;IGHA2 | Putative uncharacterized protein DKFZp686016217 (Fragment) |            |            |            |     |    |     |     |    |    |
|                              | -6.484977    | -6.747694                      | -5.960507                                                  | -6.482668  | -6.289311  | -7.063762  |     |    |     |     |    |    |
|                              | -7.663323    | -6.444286                      | -6.367355                                                  | -7.090292  | 109        | 22         | 33  | 24 |     |     |    |    |
|                              | 72           | 20                             | 27                                                         | 14         | 11         | 15         | 19  | 11 |     |     |    |    |
| IPI00291866.5                | Tax_Id=9606  | Gene_Symbol=SERPING1           | Plasma protease C1 inhibitor                               |            |            |            |     |    |     |     |    |    |
|                              | -7.148514    | -7.17711                       | -7.095121                                                  | -6.885234  | -7.468592  | -          |     |    |     |     |    |    |

|                                                    |             |                                |                           |            |            |     |     |     |     |    |   |
|----------------------------------------------------|-------------|--------------------------------|---------------------------|------------|------------|-----|-----|-----|-----|----|---|
| 6.263533                                           | -6.187958   | -6.30563                       | -7.58032                  | -6.383756  | -7.369892  | -   |     |     |     |    |   |
| 8.105901                                           | 18          | 14                             | 18                        | 21         | 16         | 25  | 30  | 30  | 12  | 16 | 7 |
| 4                                                  |             |                                |                           |            |            |     |     |     |     |    |   |
| IPI00947137.1                                      | Tax_Id=9606 | Gene_Symbol=-                  | Protein                   | -6.83654   | -6.431499  |     |     |     |     |    |   |
| -6.783146                                          | -6.602247   | -6.856513                      | -6.908671                 | -6.15042   | -6.647582  |     |     |     |     |    |   |
| -7.62502                                           | -6.264153   | -5.825773                      | -6.600003                 | 15         | 18         | 15  | 17  |     |     |    |   |
| 18                                                 | 8           | 19                             | 13                        | 7          | 11         | 20  | 11  |     |     |    |   |
| IPI00006114.4                                      | Tax_Id=9606 | Gene_Symbol=SERPINF1           | Pigment epithelium-       |            |            |     |     |     |     |    |   |
| derived factor                                     | -7.026546   | -6.997984                      | -7.408471                 | -7.553405  | -7.422997  |     |     |     |     |    |   |
| -8.610135                                          | -6.151932   | -7.042794                      | -7.806659                 | -7.185458  | -6.571726  |     |     |     |     |    |   |
| -7.233627                                          | 17          | 14                             | 11                        | 9          | 14         | 2   | 26  | 12  | 8   | 6  |   |
| 13                                                 | 8           |                                |                           |            |            |     |     |     |     |    |   |
| IPI00879231.1                                      | Tax_Id=9606 | Gene_Symbol=SERPINF2           | Alpha-2-antiplasmin       |            |            |     |     |     |     |    |   |
| -7.941281                                          | -7.313097   | -7.664744                      | -7.513697                 | -7.658068  | -8.07795   |     |     |     |     |    |   |
| -6.737778                                          | -7.386078   | -8.660768                      | -7.751886                 | -6.995053  | -7.682271  |     |     |     |     |    |   |
| 8                                                  | 12          | 10                             | 11                        | 13         | 4          | 17  | 10  | 4   | 4   | 10 | 6 |
| IPI00654755.3                                      | Tax_Id=9606 | Gene_Symbol=HBB                | Hemoglobin subunit beta - |            |            |     |     |     |     |    |   |
| 6.512125                                           | -6.800233   | -5.670275                      | -7.606968                 | -7.225246  | -7.159621  | -   |     |     |     |    |   |
| 5.725923                                           | -6.690893   | -8.147904                      | -6.545875                 | -6.482189  | -6.658582  | 10  |     |     |     |    |   |
| 6                                                  | 22          | 3                              | 6                         | 3          | 14         | 6   | 2   | 4   | 5   | 5  |   |
| IPI00021842.1                                      | Tax_Id=9606 | Gene_Symbol=APOE               | Apolipoprotein E          | -9.58318   |            |     |     |     |     |    |   |
| -8.261849                                          | -6.890729   | -7.68229                       | -7.387579                 | -6.461753  | -7.187539  |     |     |     |     |    |   |
| -8.152509                                          | -8.510908   | -7.314344                      | -10.692677                | -10.86907  | 1          | 3   |     |     |     |    |   |
| 14                                                 | 6           | 11                             | 13                        | 7          | 3          | 3   | 4   | 0   | 0   |    |   |
| IPI00011252.1                                      | Tax_Id=9606 | Gene_Symbol=C8A                | Complement component C8   |            |            |     |     |     |     |    |   |
| alpha chain                                        | -8.248269   | -8.585166                      | -9.042173                 | -8.698755  | -8.317032  | -   |     |     |     |    |   |
| 8.028264                                           | -7.346553   | -8.475826                      | -8.42876                  | -11.144219 | -7.679335  | -   |     |     |     |    |   |
| 7.855728                                           | 7           | 4                              | 3                         | 4          | 8          | 5   | 11  | 4   | 6   | 0  | 6 |
| 6                                                  |             |                                |                           |            |            |     |     |     |     |    |   |
| IPI00020996.5                                      | Tax_Id=9606 | Gene_Symbol=IGFALS             | Insulin-like growth       |            |            |     |     |     |     |    |   |
| factor-binding protein complex acid labile subunit | -12.062088  | -8.620494                      |                           |            |            |     |     |     |     |    |   |
| -9.482966                                          | -9.427229   | -8.640042                      | -7.727119                 | -7.582551  | -8.511154  |     |     |     |     |    |   |
| -8.309937                                          | -8.653818   | -8.120128                      | -9.682815                 | 0          | 4          | 2   | 2   |     |     |    |   |
| 6                                                  | 7           | 9                              | 4                         | 7          | 2          | 4   | 1   |     |     |    |   |
| IPI00023014.2                                      | Tax_Id=9606 | Gene_Symbol=VWF                | von Willebrand factor     | -          |            |     |     |     |     |    |   |
| 11.766285                                          | -13.376148  | -11.712892                     | -13.489736                | -9.889138  | -13.042389 | -   |     |     |     |    |   |
| 10.217942                                          | -11.434226  | -11.099478                     | -12.716325                | -9.251441  | -13.052175 | 1   |     |     |     |    |   |
| 0                                                  | 1           | 0                              | 8                         | 0          | 3          | 1   | 2   | 0   | 6   | 0  |   |
| IPI00784865.1                                      | Tax_Id=9606 | Gene_Symbol=IGK@               | IGK@ protein              | -3.137507  |            |     |     |     |     |    |   |
| -3.508563                                          | -3.258366   | -3.533533                      | -3.626773                 | -3.408622  | -4.084789  |     |     |     |     |    |   |
| -3.365064                                          | -3.363808   | -4.278434                      | -3.820094                 | -3.60562   | 469        | 259 |     |     |     |    |   |
| 394                                                | 283         | 352                            | 205                       | 116        | 268        | 384 | 62  | 115 | 170 |    |   |
| IPI00154742.6                                      | Tax_Id=9606 | Gene_Symbol=IGLV2-14;IGLC2     | IGL@ protein -            |            |            |     |     |     |     |    |   |
| 4.275653                                           | -4.34735    | -4.621036                      | -4.826664                 | -4.277887  | -4.304281  | -   |     |     |     |    |   |
| 4.059184                                           | -4.29358    | -4.651979                      | -4.635858                 | -5.060007  | -4.158197  | 149 |     |     |     |    |   |
| 111                                                | 100         | 77                             | 182                       | 83         | 118        | 105 | 105 | 43  | 33  | 97 |   |
| IPI00893853.1                                      | Tax_Id=9606 | Gene_Symbol=LOC100126583;IGHA2 | Protein -                 |            |            |     |     |     |     |    |   |
| 4.744198                                           | -6.130918   | -5.864925                      | -6.077452                 | -5.442281  | -5.99783   | -   |     |     |     |    |   |
| 5.593751                                           | -6.279407   | -6.986113                      | -5.728924                 | -5.777156  | -6.25893   | 110 |     |     |     |    |   |
| 22                                                 | 34          | 26                             | 67                        | 18         | 30         | 17  | 12  | 17  | 19  | 14 |   |
| IPI00423461.3                                      | Tax_Id=9606 | Gene_Symbol=LOC100126583;IGHA2 | Putative                  |            |            |     |     |     |     |    |   |
| uncharacterized protein DKFZp686C02220 (Fragment)  | -5.356755   | -6.725125                      |                           |            |            |     |     |     |     |    |   |
| -6.488985                                          | -6.751702   | -5.992686                      | -6.486676                 | -6.293319  | -7.06777   |     |     |     |     |    |   |



|                                  |             |           |                     |            |                          |            |           |     |     |     |
|----------------------------------|-------------|-----------|---------------------|------------|--------------------------|------------|-----------|-----|-----|-----|
|                                  | -7.500277   | -6.517287 | -6.371363           | -7.007288  | 108                      | 22         | 33        | 24  |     |     |
|                                  | 70          | 20        | 27                  | 14         | 13                       | 14         | 19        | 12  |     |     |
| IPI00032220.3                    | Tax_Id=9606 |           | Gene_Symbol=AGT     |            | Angiotensinogen          |            | -7.52352  |     |     |     |
|                                  | -6.489871   | -6.959301 | -6.680421           | -6.991846  | -7.372508                | -7.160801  |           |     |     |     |
|                                  | -6.275171   | -7.201554 | -7.046444           | -6.289611  | -6.571364                | 12         | 27        |     |     |     |
|                                  | 20          | 25        | 25                  | 8          | 11                       | 30         | 17        | 8   | 20  | 18  |
| IPI00291262.3                    | Tax_Id=9606 |           | Gene_Symbol=CLU     |            | Isoform 1 of Clusterin   |            | -         |     |     |     |
|                                  | 7.158712    | -7.223676 | -7.575323           | -7.049582  | -7.243224                | -7.072238  | -         |     |     |     |
|                                  | 6.303517    | -6.55472  | -7.185053           | -6.340709  | -6.643267                | -6.126513  | 16        |     |     |     |
|                                  | 12          | 10        | 16                  | 18         | 10                       | 24         | 21        | 16  | 15  | 13  |
| IPI00022426.1                    | Tax_Id=9606 |           | Gene_Symbol=AMBP    |            | Protein AMBP             |            | -7.290014 |     |     |     |
|                                  | -6.631977   | -6.744144 | -6.806191           | -7.056991  | -6.646525                | -6.673229  |           |     |     |     |
|                                  | -6.870944   | -7.075192 | -7.419073           | -6.56693   | -6.502161                | 11         | 17        |     |     |     |
|                                  | 18          | 16        | 17                  | 12         | 13                       | 12         | 14        | 4   | 11  | 14  |
| IPI00218732.3                    | Tax_Id=9606 |           | Gene_Symbol=PON1    |            | Serum                    |            |           |     |     |     |
| paraoxonase/arylesterase 1       | -7.131446   | -7.171092 | -7.340417           | -7.284681  |                          |            |           |     |     |     |
|                                  | -7.259633   | -6.837333 | -6.474077           | -7.167113  | -7.324841                | -10.646436 |           |     |     |     |
|                                  | -7.181552   | -7.070263 | 13                  | 10         | 10                       | 10         | 14        | 10  | 16  | 9   |
|                                  | 11          | 0         | 6                   | 8          |                          |            |           |     |     |     |
| IPI00011261.2                    | Tax_Id=9606 |           | Gene_Symbol=C8G     |            | Complement component C8  |            |           |     |     |     |
| gamma chain                      | -7.053104   | -7.300389 | -7.133242           | -6.720831  | -7.38893                 | -          |           |     |     |     |
|                                  | 6.273483    | -6.197909 | -6.854577           | -7.212976  | -6.86371                 | -7.023167  | -         |     |     |     |
|                                  | 7.487242    | 8         | 5                   | 7          | 10                       | 7          | 10        | 12  | 7   | 7   |
|                                  | 3           |           |                     |            |                          |            |           |     |     |     |
| IPI00163207.1                    | Tax_Id=9606 |           | Gene_Symbol=PGLYRP2 |            | Isoform 1 of N-          |            |           |     |     |     |
| acetylmuramoyl-L-alanine amidase | -7.877801   | -8.011757 | -8.181082           | -          |                          |            |           |     |     |     |
|                                  | 8.684961    | -7.984785 | -7.677998           | -7.42807   | -7.768886                | -8.597288  | -         |     |     |     |
|                                  | 8.604697    | -7.665542 | -7.841935           | 10         | 7                        | 7          | 4         | 11  | 7   | 10  |
|                                  | 8           | 5         | 2                   | 6          | 6                        |            |           |     |     |     |
| IPI00953689.1                    | Tax_Id=9606 |           | Gene_Symbol=AHSG    |            | Alpha-2-HS-glycoprotein  |            |           |     |     |     |
|                                  | -8.631028   | -8.813774 | -8.983099           | -8.234216  | -8.140175                | -7.563725  |           |     |     |     |
|                                  | -7.082685   | -8.298969 | -9.75598            | -8.153951  | -8.313409                | -8.084336  |           |     |     |     |
|                                  | 3           | 2         | 2                   | 4          | 6                        | 5          | 9         | 3   | 1   | 2   |
| IPI00304273.2                    | Tax_Id=9606 |           | Gene_Symbol=APOA4   |            | Apolipoprotein A-IV      |            |           |     |     |     |
|                                  | 9.112545    | -7.973536 | -7.96054            | -8.310268  | -8.621693                | -11.081796 | -         |     |     |     |
|                                  | 7.410052    | -7.527724 | -11.664614          | -10.755732 | -10.91519                | -11.091583 | 2         |     |     |     |
|                                  | 5           | 6         | 4                   | 0          | 7                        | 7          | 0         | 0   | 0   | 0   |
| IPI00550731.2                    | Tax_Id=9606 |           | Gene_Symbol=-       |            | Putative uncharacterized |            |           |     |     |     |
| protein                          | -3.139534   | -3.475904 | -3.258387           | -3.518288  | -3.616932                | -          |           |     |     |     |
|                                  | 3.406726    | -4.063519 | -3.366564           | -3.360935  | -4.141534                | -3.749344  | -         |     |     |     |
|                                  | 3.606556    | 474       | 271                 | 399        | 291                      | 360        | 208       | 120 | 271 | 390 |
|                                  | 172         |           |                     |            |                          |            |           |     |     |     |
| IPI00784773.13                   | Tax_Id=9606 |           | Gene_Symbol=-       |            | Putative uncharacterized |            |           |     |     |     |
| protein                          | -3.152545   | -3.520214 | -3.276292           | -3.562209  | -3.623937                | -          |           |     |     |     |
|                                  | 3.423365    | -4.137899 | -3.383897           | -3.36903   | -4.311224                | -3.846527  | -         |     |     |     |
|                                  | 3.635473    | 462       | 256                 | 387        | 275                      | 353        | 202       | 110 | 263 | 382 |
|                                  | 165         |           |                     |            |                          |            |           |     |     |     |
| IPI00853045.1                    | Tax_Id=9606 |           | Gene_Symbol=IGKC    |            | Anti-RhD monoclonal T125 |            |           |     |     |     |
| kappa light chain                | -3.144034   | -3.511703 | -3.267781           | -3.553698  | -3.626822                | -          |           |     |     |     |
|                                  | -3.414854   | -4.120338 | -3.375387           | -3.36314   | -4.269923                | -3.838016  |           |     |     |     |
|                                  | -3.626962   | 462       | 256                 | 387        | 275                      | 349        | 202       | 111 | 263 | 381 |
|                                  | 112         | 165       |                     |            |                          |            |           |     |     |     |
| IPI00909649.4                    | Tax_Id=9606 |           | Gene_Symbol=IGKC    |            | Ig kappa chain C region  |            |           |     |     |     |
|                                  | -3.543785   | -3.911454 | -3.667532           | -3.953449  | -4.023712                | -3.814605  |           |     |     |     |

|               |                                                                                       |            |            |            |           |           |           |     |     |     |     |     |
|---------------|---------------------------------------------------------------------------------------|------------|------------|------------|-----------|-----------|-----------|-----|-----|-----|-----|-----|
|               | -4.529139                                                                             | -3.775137  | -3.762891  | -4.702464  | -4.237767 | -4.026713 |           |     |     |     |     |     |
|               | 462                                                                                   | 256        | 387        | 275        | 350       | 202       | 110       | 263 | 381 | 60  | 112 | 165 |
| IPI00956314.2 | Tax_Id=9606 Gene_Symbol=IGLC3 hypothetical protein                                    |            |            |            |           |           |           |     |     |     |     |     |
| XP_002348153  | -4.4444                                                                               | -4.50468   | -4.869497  | -5.042602  | -4.409565 |           |           |     |     |     |     |     |
|               | -4.526262                                                                             | -4.205564  | -4.493458  | -4.801595  | -4.780016 | -5.309847 |           |     |     |     |     |     |
|               | -4.320936                                                                             | 142        | 107        | 88         | 70        | 180       | 75        | 115 | 97  | 102 | 42  |     |
|               | 29                                                                                    | 93         |            |            |           |           |           |     |     |     |     |     |
| IPI00887169.2 | Tax_Id=9606 Gene_Symbol=IGLV1-44 Putative uncharacterized protein                     |            |            |            |           |           |           |     |     |     |     |     |
|               | -4.354606                                                                             | -4.349606  | -4.110992  | -4.391703  | -4.739739 | -4.667899 |           |     |     |     |     |     |
|               | -5.19773                                                                              | -4.298767  | 143        | 106        | 82        | 78        | 170       | 80  | 113 | 96  |     |     |
|               | 97                                                                                    | 42         | 29         | 85         |           |           |           |     |     |     |     |     |
| IPI00807428.1 | Tax_Id=9606 Gene_Symbol=- Putative uncharacterized protein                            |            |            |            |           |           |           |     |     |     |     |     |
|               | -4.342221                                                                             | -4.446024  | -4.926405  | -4.940627  | -4.298773 | -         |           |     |     |     |     |     |
|               | 4.45072                                                                               | -4.106745  | -4.430016  | -4.799345  | -4.663652 | -5.382726 | -         |     |     |     |     |     |
|               | 4.294521                                                                              | 140        | 101        | 74         | 69        | 179       | 72        | 113 | 92  | 91  | 42  | 24  |
|               | 85                                                                                    |            |            |            |           |           |           |     |     |     |     |     |
| IPI00292946.1 | Tax_Id=9606 Gene_Symbol=SERPINA7 Thyroxine-binding globulin                           |            |            |            |           |           |           |     |     |     |     |     |
|               | -7.36765                                                                              | -6.739466  | -7.401268  | -7.797516  | -7.489902 | -         |           |     |     |     |     |     |
|               | 7.350169                                                                              | -7.100241  | -7.122603  | -7.932987  | -7.178256 | -7.337713 | -         |     |     |     |     |     |
|               | 7.919571                                                                              | 12         | 18         | 11         | 7         | 13        | 7         | 10  | 11  | 7   | 6   | 6   |
|               | 4                                                                                     |            |            |            |           |           |           |     |     |     |     |     |
| IPI00025204.1 | Tax_Id=9606 Gene_Symbol=CD5L CD5 antigen-like                                         |            |            |            |           |           |           |     |     |     |     |     |
|               | -7.841446                                                                             | -7.82845   | -7.772713  | -7.678673  | -7.037684 | -7.144431 |           |     |     |     |     |     |
|               | -7.732106                                                                             | -7.620502  | -8.097914  | -6.753294  | -7.181001 | 6         | 5         |     |     |     |     |     |
|               | 6                                                                                     | 6          | 9          | 8          | 8         | 5         | 8         | 2   | 9   | 7   |     |     |
| IPI00022391.1 | Tax_Id=9606 Gene_Symbol=APCS Serum amyloid P-component                                |            |            |            |           |           |           |     |     |     |     |     |
|               | -6.928865                                                                             | -7.622437  | -7.232146  | -8.023708  | -7.035849 | -6.372387 |           |     |     |     |     |     |
|               | -6.479134                                                                             | -7.513097  | -7.648352  | -7.655761  | -7.122071 | -7.991611 |           |     |     |     |     |     |
|               | 10                                                                                    | 4          | 7          | 3          | 11        | 10        | 10        | 4   | 5   | 2   | 4   | 2   |
| IPI00909594.1 | "Tax_Id=9606 Gene_Symbol=C7 cDNA FLJ58413, highly similar to Complement component C7" |            |            |            |           |           |           |     |     |     |     |     |
|               | -8.515062                                                                             | -7.910196  | -8.067715  | -7.951318  | -7.732518 | -8.011183 |           |     |     |     |     |     |
|               | -7.741651                                                                             | -7.677965  | -8.770648  | 4          | 8         | 7         | 4         | 10  | 4   |     |     |     |
|               | 5                                                                                     | 7          | 4          | 4          | 5         | 2         |           |     |     |     |     |     |
| IPI00328609.3 | Tax_Id=9606 Gene_Symbol=SERPINA4 Kallistatin                                          |            |            |            |           |           |           |     |     |     |     |     |
|               | -7.712433                                                                             | -9.134522  | -8.385638  | -8.291597  | -9.324585 | -6.946425 |           |     |     |     |     |     |
|               | -7.757244                                                                             | -8.115643  | -8.305373  | -7.078536  | -7.724933 | 4         | 7         |     |     |     |     |     |
|               | 2                                                                                     | 4          | 6          | 1          | 12        | 6         | 6         | 2   | 8   | 5   |     |     |
| IPI00383338.1 | Tax_Id=9606 Gene_Symbol=ITIH1 PRO2769                                                 |            |            |            |           |           |           |     |     |     |     |     |
|               | 8.417801                                                                              | -8.874808  | -7.720459  | -8.842814  | -8.084042 | -7.179188 | -         |     |     |     |     |     |
|               | 9.001608                                                                              | -8.66686   | -10.976853 | -7.917435  | -7.688363 | 11        | 4         | 3   |     |     |     |     |
|               | 9                                                                                     | 4          | 4          | 11         | 2         | 4         | 0         | 4   | 6   |     |     |     |
| IPI00479116.1 | Tax_Id=9606 Gene_Symbol=CPN2 Carboxypeptidase N subunit                               |            |            |            |           |           |           |     |     |     |     |     |
|               | 2                                                                                     | -9.431917  | -8.292907  | -10.071671 | -8.406496 | -8.247917 | -8.469974 |     |     |     |     |     |
|               | -8.065895                                                                             | -9.793005  | -9.052792  | -11.075104 | -7.792542 | -7.968935 |           |     |     |     |     |     |
|               | 2                                                                                     | 5          | 1          | 5          | 8         | 3         | 5         | 1   | 3   | 0   | 5   | 5   |
| IPI00019943.1 | Tax_Id=9606 Gene_Symbol=AFM Afamin                                                    |            |            |            |           |           |           |     |     |     |     |     |
|               | -7.863561                                                                             | -11.942991 | -9.323222  | -8.56445   | -8.383515 | -9.194334 |           |     |     |     |     |     |
|               | -10.24588                                                                             | -11.16958  | -8.397843  | -8.286554  | 3         | 6         | 10        | 0   |     |     |     |     |
|               | 3                                                                                     | 3          | 4          | 2          | 1         | 0         | 3         | 4   |     |     |     |     |
| IPI00022371.1 | Tax_Id=9606 Gene_Symbol=HRG Histidine-rich glycoprotein                               |            |            |            |           |           |           |     |     |     |     |     |
|               | -8.989064                                                                             | -8.478663  | -8.935671  | -8.879934  | -8.680533 | -7.739439 |           |     |     |     |     |     |

|                 |                                                          |            |            |            |            |            |   |   |   |   |   |   |
|-----------------|----------------------------------------------------------|------------|------------|------------|------------|------------|---|---|---|---|---|---|
|                 | -8.539333                                                | -9.062471  | -9.42087   | -11.037716 | -8.671445  | -8.154691  |   |   |   |   |   |   |
|                 | 3                                                        | 4          | 3          | 3          | 5          | 6          | 3 | 2 | 2 | 0 | 2 | 4 |
| IPI00009867.3   | "Tax_Id=9606 Gene_Symbol=KRT5 Keratin, type II           |            |            |            |            |            |   |   |   |   |   |   |
| cytoskeletal 5" | -8.412641                                                | -11.814263 | -11.983589 | -10.095271 | -10.406695 |            |   |   |   |   |   |   |
|                 | -7.856164                                                | -9.061523  | -9.179195  | -10.230741 | -8.223247  | -7.689557  |   |   |   |   |   |   |
|                 | -8.964562                                                | 6          | 0          | 0          | 1          | 1          | 6 | 2 | 2 | 1 | 3 |   |
|                 | 6                                                        | 2          |            |            |            |            |   |   |   |   |   |   |
| IPI00746623.2   | Tax_Id=9606 Gene_Symbol=HABP2 Hyaluronan-binding protein |            |            |            |            |            |   |   |   |   |   |   |
| 2               | -9.459068                                                | -9.929496  | -9.405674  | -8.944473  | -12.187091 | -11.428319 |   |   |   |   |   |   |
|                 | -8.093046                                                | -8.433862  | -9.079943  | -8.576526  | -8.330518  | -8.506911  |   |   |   |   |   |   |
|                 | 2                                                        | 1          | 2          | 3          | 0          | 0          | 5 | 4 | 3 | 2 | 3 | 3 |
| IPI00007240.2   | Tax_Id=9606 Gene_Symbol=F13B Coagulation factor XIII B   |            |            |            |            |            |   |   |   |   |   |   |
| chain           | -9.624885                                                | -11.927895 | -9.571491  | -9.515755  | -8.728567  | -11.594136 |   |   |   |   |   |   |
|                 | -8.769689                                                | -8.599679  | -12.176954 | -8.742343  | -8.496335  | -9.771341  |   |   |   |   |   |   |
|                 | 2                                                        | 0          | 2          | 2          | 6          | 0          | 3 | 4 | 0 | 2 | 3 | 1 |
| IPI00020986.2   | Tax_Id=9606 Gene_Symbol=LUM Lumican                      |            |            |            |            |            |   |   |   |   |   |   |
|                 | -8.954177                                                | -          |            |            |            |            |   |   |   |   |   |   |
| 9.424605        | -11.426512                                               | -8.439582  | -8.463324  | -9.090847  | -7.405834  | -          |   |   |   |   |   |   |
| 8.216653        | -9.673665                                                | -8.764782  | -10.756821 | -9.100633  | 2          | 1          | 0 |   |   |   |   |   |
|                 | 3                                                        | 4          | 1          | 6          | 3          | 1          | 1 | 0 | 1 |   |   |   |
| IPI00242956.5   | Tax_Id=9606 Gene_Symbol=FCGBP IgGFc-binding protein-     |            |            |            |            |            |   |   |   |   |   |   |
|                 | -14.251939                                               | -12.196639 | -14.198546 | -14.142809 | -10.542211 | -10.764268 | - |   |   |   |   |   |
| 11.969627       | -13.919881                                               | -11.752551 | -11.536816 | -13.528855 | -11.872667 | 0          |   |   |   |   |   |   |
|                 | 1                                                        | 0          | 0          | 8          | 3          | 1          | 0 | 2 | 1 | 0 | 1 |   |
