# Supplementary material for: Serum Proteome Changes in Healthy Subjects with Different Genotypes ofNOS1APin the Chinese Population
Source: Hindawi journal article supplement (doi:10.1155/2013/357630), 2013-01-01
Supplement: f2 [file 357630.f2.pdf]

Supplementary table2 Clinical characteristics of the CC carriers and AA carriers for validation

|                          | CC (N=24) |      | AA (N=24) |      | P value |
|--------------------------|-----------|------|-----------|------|---------|
|                          | mean      | str  | mean      | str  |         |
| age (year)               | 56.92     | 1.55 | 57.46     | 1.17 | 0.7819  |
| sex<br>(male/female)     | 4/20      |      | 0/24      |      | 0.0428  |
| BMI (kg/m <sup>2</sup> ) | 23.15     | 0.55 | 23.70     | 0.56 | 0.4889  |
| FPG (mmol/L)             | 4.82      | 0.10 | 4.99      | 0.09 | 0.2331  |
| 2h glucose<br>(mmol/L)   | 5.78      | 0.21 | 5.59      | 0.22 | 0.5365  |
| HbA1c(%)                 | 5.60      | 0.07 | 5.50      | 0.07 | 0.6238  |
| TC (mmol/l)              | 4.93      | 0.21 | 5.19      | 0.19 | 0.3782  |
| TG (mmol/L)              | 1.65      | 0.21 | 1.60      | 0.15 | 0.8425  |
| HDL(mmol/L)              | 1.42      | 0.08 | 1.43      | 0.07 | 0.9649  |
| LDL(mmol/L)              | 3.05      | 0.17 | 3.40      | 0.15 | 0.1408  |
